# Supplementary material
Source: MDPI journal article supplement (https://www.mdpi.com/2624-795X/2/3/13)
Supplement: s1 [file s1]

## SUPPLEMENTARY DATA

### Amino acid racemization/epimerization (AAR) dating of *Glycymeris* from the Tenerife, Lanzarote and Gran Canaria

Mean D/L values of isoleucine, aspartic acid, alanine, valine and glutamic acid measured in *Glycymeris* shells from different localities. N: number of samples analysed

| Site/locality                 |                    | N  | D-allo/L-Ile | D/L Asp     | D/L Ala     | D/L Val     | D/L Glu     | Age (ka) |
|-------------------------------|--------------------|----|--------------|-------------|-------------|-------------|-------------|----------|
| Teno platform (Tenerife)      | Teno -1            | 7  | 0.537±0.105  | 0.535±0.018 | 0.734±0.094 | 0.487±0.065 | 0.394±0.027 | 141 ± 27 |
|                               | Teno -2            | 15 | 0.554±0.084  | 0.551±0.083 | 0.694±0.071 | 0.437±0.042 | 0.417±0.091 | 145 ± 23 |
|                               | Faro               | 11 | 0.474±0.067  | 0.661±0.040 | 0.821±0.054 | 0.651±0.083 | 0.520±0.045 | 126 ± 17 |
| Isla Baja platform (Tenerife) | Playa Las Arenas-1 | 4  | 0.455±0.049  | 0.675±0.037 | 0.790±0.070 | 0.634±0.106 | 0.526±0.067 | 119 ± 13 |
|                               | Playa Las Arenas-2 | 2  | 0.535±0.013  | 0.691±0.011 | 0.772±0.005 | 0.503±0.080 | 0.562±0.030 | 141 ± 3  |
|                               | Cenizales-1        | 6  | 0.469±0.029  | 0.681±0.058 | 0.772±0.051 | 0.434±0.034 | 0.542±0.028 | 123 ± 8  |
|                               | Cenizales-2        | 6  | 0.288±0.009  | 0.508±0.043 | 0.607±0.035 | 0.360±0.023 | 0.374±0.017 | 74 ± 2   |
| Piedra Alta (Lanzarote)       | Piedra Alta -1     | 7  | 0.824±0.001  | 0.625±0.003 | 0.934±0.027 | 0.723±0.070 | 0.628±0.001 | 218 ± 3  |
|                               | Piedra Alta -2     | 7  | 0.670±0.092  | 0.722±0.063 | 0.937±0.038 | 0.661±0.053 | 0.693±0.095 | 181 ± 27 |
| Agaete (Gran Canaria)         | Aldea-1            | 7  | 0.612±0.078  | 0.642±0.062 | 0.858±0.053 | 0.649±0.068 | 0.562±0.051 | 164 ± 23 |
|                               | Aldea-2            | 5  | 0.610±0.033  | 0.632±0.034 | 0.799±0.048 | 0.638±0.049 | 0.581±0.040 | 160 ± 8  |
|                               | Turman             | 5  | 0.683±0.078  | 0.661±0.052 | 0.854±0.052 | 0.699±0.060 | 0.616±0.082 | 180 ± 21 |

## Thermoluminescence dating (TL) in quartz grains from Agaete (Gran Canaria)

| Samples Agaete |              |                                              |
|----------------|--------------|----------------------------------------------|
| Aldea -1       | MAD-5759SDA  | Base inf. - Nivel TSU-1 - Cota 64 m          |
| Aldea -2       | MAD-5788SDA  | Costra sup. - Nivel TSU-1 - Cota 64 m        |
| Aldea -3       | MAD-5789RSDA | Base nivel alto - TSU-2a - Cota 71 m         |
| Aldea -4       | MAD-5760SDA  | Techo nivel alto - Nivel TSUN-26 - Cota 71 m |

### Result of TL measures

| Referencia Laboratorio | Dosis Equivalente (Gy) | Dosis Anual (mGy/año) | Número de años B.P. | Localización     |
|------------------------|------------------------|-----------------------|---------------------|------------------|
| MAD-5759SDA            | 233,37                 | 1,65                  | 141436±17719        | costra (Aldea-1) |
| MAD-5788SDA            | 193,86                 | 1,36                  | 142544±18558        | costra (Aldea-2) |
| MAD-5789RSDA           | 155,01                 | 2,50                  | 62003±7333          | costra (Aldea-3) |
| MAD-5760SDA            | 95,31                  | 1,56                  | 61730±7691          | costra (Aldea-4) |

### TL measures

| Referencia Laboratorio | Dosis Equivalente | Supralinealidad (Gy) | Plateau (°C) | Factor K | Condiciones                 |
|------------------------|-------------------|----------------------|--------------|----------|-----------------------------|
| MAD-5759SDA            | 233,37±37,58      | 0                    | 370-410      | 0,07     | Tamaño grano de 2-10 micras |
| MAD-5788SDA            | 193,86±39,56      | 0                    | 350-400      | 0,29     |                             |
| MAD-5789RSDA           | 155,01±35,76      | 0                    | 330-380      | 0,22     |                             |
| MAD-5760SDA            | 95,31±17,39       | 0,99                 | 300-350      | 0,17     |                             |

### Parámetros asociados a Dosis Anual

| Material Calcáreo |        |         |                     |                     |                        |
|-------------------|--------|---------|---------------------|---------------------|------------------------|
| Muestra           | U(ppm) | Th(ppm) | K <sub>2</sub> O(%) | H <sub>2</sub> O(%) | H <sub>2</sub> Osat(%) |
| MAD-5759SDA       | 1,71   | 3,36    | 0,32                | 3,49                | 7,52                   |
| MAD-5788SDA       | 0,47   | 1,43    | 0,01                | 5,44                | 20,13                  |
| MAD-5789RSDA      | 1,94   | 1,94    | 0,02                | 3,01                | 11,00                  |
| MAD-5760SDA       | 1,01   | 1,40    | 0,11                | 5,45                | 20,98                  |

### U-Th dating of coral fragments from Teno (Tenerife) and Piedra Alta (Lanzarote)

U and Th activity ratios in Canary Islands corals for the first group of corals (2013)

| Sample      | Location    | [ <sup>230</sup> Th/ <sup>238</sup> U] | [ <sup>234</sup> U/ <sup>238</sup> U] | [ <sup>238</sup> U/ <sup>232</sup> Th] | [ <sup>230</sup> Th/ <sup>232</sup> Th] |
|-------------|-------------|----------------------------------------|---------------------------------------|----------------------------------------|-----------------------------------------|
| PA1-I       | Piedra Alta | 0.3349                                 | 1.0489                                | 177                                    | 59                                      |
| PA1-II      | Piedra Alta | 7.1710                                 | 1.0759                                | 3                                      | 18                                      |
| LZ-2A-I     | Piedra Alta | 0.3602                                 | 1.0249                                | 1152                                   | 415                                     |
| LZ-2A-II    | Piedra Alta | 5.4063                                 | 1.0293                                | 19                                     | 100                                     |
| LZ-2B-I     | Piedra Alta | 0.4635                                 | 1.0773                                | 185                                    | 86                                      |
| LZ-2B-II    | Piedra Alta | 4.2327                                 | 0.9902                                | 8                                      | 35                                      |
| TB-3-I      | Tenerif     | 0.1827                                 | 1.1052                                | 143                                    | 26                                      |
| TB-3-II     | Tenerif     | 6.3689                                 | 1.0972                                | 1                                      | 7                                       |
| TB-4-I      | Tenerif     | 0.1838                                 | 1.1317                                | 27                                     | 5                                       |
| TB-4-II     | Tenerif     | 3.1123                                 | 1.0428                                | 1                                      | 2                                       |
| LANZA-I     | Piedra Alta | 0.2383                                 | 1.0473                                | 123                                    | 29                                      |
| LANZA-II    | Piedra Alta | 7.7992                                 | 1.0821                                | 1                                      | 8                                       |
| LANZA-M6-I  | Piedra Alta | 0.2609                                 | 1.0513                                | 180                                    | 47                                      |
| LANZA-M6-II | Piedra Alta | 8.4661                                 | 1.1025                                | 2                                      | 19                                      |
| TENO-I      | Tenerif     | 0.5154                                 | 1.0332                                | 200                                    | 103                                     |
| TENO-II     | Tenerif     | 16.2984                                | 1.0976                                | 2                                      | 26                                      |
| TENO M7-I   | Tenerif     | 0.3698                                 | 1.0416                                | 310                                    | 115                                     |
| TENO M7-II  | Tenerif     | 11.0627                                | 1.0506                                | 3                                      | 31                                      |

Errors on the activity ratios are lower than 0.7 %

Th ratios and ages in corals from second group (2017)

| Sample   | 2err | 230Th/229Th | error   | 2err    | U-Th C.S age | err (+/-) | ~U-Th C.S age (Ka) |
|----------|------|-------------|---------|---------|--------------|-----------|--------------------|
| Ten 11   | 3,8  | 0,300914    | 0,0023  | 0,0046  | 43618        | 885       | 44                 |
| Ten 12   | 58   | 0,91107     | 0,0041  | 0,0082  |              |           |                    |
| Ten 13   | 54   | 0,69979     | 0,00523 | 0,01046 |              |           |                    |
| Ten 14   | 64   | 0,5041644   | 0,0032  | 0,0064  |              |           |                    |
| Ten 15   | 102  | 0,400125    | 0,00283 | 0,00566 | 213528       | 12119     | 214                |
| Ten 16   | 98   | 0,37091     | 0,00155 | 0,0031  | 61407        | 1047      | 61                 |
| LAN-LS1* | 2,32 | 0,68721     | 0,00427 | 0,00854 | 110585       | 2563      | 111                |
| LAN 2    | 18,6 | 0,91155     | 0,0095  | 0,019   | 299152       | 41918     | 299                |
| LAN 3    | 8,2  | 0,665444    | 0,0052  | 0,0104  | 342555       | 44291     | 343                |
| LAN 4    | 4,48 | 0,62195     | 0,00058 | 0,00116 | 211316       | 3850      | 211                |
| LAN 5    | 4,2  | 0,78761     | 0,00475 | 0,0095  | 357844       | 41993     | 358                |
| LAN 6-2  | 4    | 0,54759     | 0,0028  | 0,0056  | 235931       | 9946      | 236                |
| LAN 7    | 2    | 0,47025     | 0,0035  | 0,007   | 135796       | 4440      | 136                |
| LAN 8    | 3,1  | 0,662       | 0,004   | 0,008   | 181751       | 6404      | 182                |
| LAN 9    | 3,4  | 0,583233    | 0,0039  | 0,0078  | 236264       | 12640     | 236                |
| LAN 10   | 5,4  | 0,77622     | 0,0046  | 0,0092  | 222133       | 10036     | 222                |

\* For Calibration and verification purposes

Activity ratios and ages of corals from the third group (2013)

| Muestras Lanzarote |                 | Age (ka)                                    |
|--------------------|-----------------|---------------------------------------------|
| 1                  | La Santa *      | 112,219 + 6,178 / -5,863 (possible MIS 5.5) |
| 2A                 | Piedra Alta – A | > 350,000                                   |
| 2B                 | Piedra Alta -B  | 192,587 +18,009 / -15,532                   |

\* For Calibration and verification purposes

| U-238 (ppm) | Th-232 (ppm) | U-234/U-238   | Th-230/Th-232     | Th-230/U-234  | Nominal date (years BP)   |
|-------------|--------------|---------------|-------------------|---------------|---------------------------|
| 3.30        | 0.22         | 1.05 +/- 0.01 | 50.120 +/- 2.424  | 1.03 +/- 0.04 | > 350,000                 |
| 4.47        | ****         | 1.15 +/- 0.01 | ****              | 0.65 +/- 0.02 | 112,219 +6,178 / -5,863   |
| 2.85        | 0.06         | 1.07 +/- 0.01 | 124.916 +/- 9.620 | 0.84 +/- 0.03 | 192,587 +18,009 / -15,532 |
